1 **Rapid classification and prediction of COVID-19 severity by MALDI-TOF**  
2 **mass spectrometry analysis of serum peptidome**

3

4 **Running title:** MALDI-TOF MS to classify and predict COVID-19 severity

5

6 **Authors:** Rosa M. Gomila,<sup>a</sup> Gabriel Martorell,<sup>a</sup> Pablo A. Fraile-Ribot,<sup>b,c</sup> Antonio  
7 Doménech-Sánchez,<sup>c,d,4</sup> Antonio Oliver,<sup>b,c</sup> Mercedes García-Gasalla,<sup>c,e</sup>  
8 Sebastián Albertí<sup>a,c,d,#</sup>

9

10 **Author's affiliation:**

11 <sup>a</sup>Servicio Científico-Técnico, Universidad de las Islas Baleares, Palma de  
12 Mallorca, Spain.

13 <sup>b</sup>Servicio de Microbiología. Hospital Universitario Son Espases, Palma de  
14 Mallorca, Spain.

15 <sup>c</sup>Instituto de Investigación Sanitaria de les Illes Balears, Palma de Mallorca,  
16 Spain.

17 <sup>d</sup>Instituto Universitario de Investigación en Ciencias de la Salud, Universidad de  
18 las Islas Baleares, Palma de Mallorca, Spain.

19 <sup>e</sup>Servicio de Medicina Interna. Hospital Universitario Son Espases, Palma de  
20 Mallorca, Spain.

21

22 # Address correspondence to Sebastian Alberti, [sebastian.alberti@uib.es](mailto:sebastian.alberti@uib.es).

23

24 **ABSTRACT**

25 Classification and early detection of severe COVID-19 patients is urgently  
26 required to establish an effective treatment. Here, we tested the utility of matrix-  
27 assisted laser desorption/ionization time-of-flight mass spectrometry (MALDI-  
28 TOF MS) to classify and predict the severity of COVID-19 in a clinical setting.  
29 We used this technology to analyse the mass spectra profiles of the sera from  
30 80 COVID-19 patients, clinically classified as mild (33), severe (26) and critical  
31 (21), and 20 healthy controls. We found a clear variability of the serum  
32 peptidome profile depending on COVID-19 severity. Seventy-eight peaks were  
33 significantly different and 12 at least four fold more intense in the set of critical  
34 patients than in the mild ones. Analysis of the resulting matrix of peak  
35 intensities by machine learning approaches classified severe (severe and  
36 critical) and non-severe (mild) patients with a 90% of accuracy. Furthermore,  
37 machine learning predicted correctly the favourable outcome of the severe  
38 patients in 85% of the cases and the unfavourable in 38% of the cases. Finally,  
39 liquid chromatography mass spectrometry analysis of sera identified five  
40 proteins that were significantly upregulated in the critical patients. They included  
41 serum amyloid proteins A1 and A2, which probably yielded the most intense  
42 peaks with  $m/z$  11,530 and 11,686 detected by MALDI-TOF MS.  
43 In summary, we demonstrated the potential of the MALDI-TOF MS as a bench  
44 to bedside technology to aid clinicians in their decisions to classify COVID-19  
45 patients and predict their evolution.

## 46 INTRODUCTION

47 Coronavirus infectious disease 19 (COVID-19) was first reported in Wuhan,  
48 Hubei province, China as a new coronavirus disease caused by a positive-  
49 strand RNA virus designated as severe acute respiratory syndrome coronavirus  
50 2 (SARS-CoV-2) (1). This virus is responsible of a pandemic of unprecedented  
51 dimensions. Approximately 80% of COVID-19 cases are asymptomatic or  
52 present mild symptoms, such as fever, cough, fatigue, and dyspnea.  
53 Conversely, about 20% of patients with COVID-19 develop viral pneumonia,  
54 with an exaggerated host inflammatory response and hypoxia, requiring  
55 intubation and mechanical ventilation (2,3). These patients, classified as  
56 clinically severe or critical life threatening infections, are mainly diagnosed  
57 empirically based on a set of clinical characteristics. However, patients with  
58 these symptoms have already evolved to a serious clinical condition that  
59 requires specialized intensive care. Therefore it is essential to set up novel and  
60 rapid approaches to identify biomarkers for symptom onset and disease  
61 progression to facilitate triage of patients and establish appropriate treatments.  
62 Peptidome-based studies using serum from patients and high-throughput  
63 spectrometric techniques promise to be valuable for the identification of COVID-  
64 19-associated biomarkers. Serum may contain proteins induced by the  
65 systemic effects or released to the lung as a result of the viral infection. Thus,  
66 patient serum can reflect the physiological or pathological state. Indeed, a  
67 proteomic and metabolomic analysis of serum from 46 COVID-19 patients  
68 performed by Shen et al demonstrated that using serum proteins and  
69 metabolite biomarkers it is possible, not only classify patients according to their  
70 grade of severity, but also predict the progression to severe COVID-19 (4).

71 More recently, Messner et al re-designed a high-throughput mass spectrometry  
72 platform that enabled the identification of up to 27 potential biomarkers that  
73 were differentially expressed depending on the severity grade of COVID-19 (5).  
74 Although the technologies used in both studies are highly sensitive and provide  
75 robust results, they are time consuming, requires specialized personnel and  
76 most importantly, they are not available in most of the hospitals, so their  
77 translation bench to bedside is limited.

78 In the present study, we used MALDI-TOF MS, a simple and fast technology,  
79 available in most of the hospitals, to conduct a comparative analysis of serum  
80 from 80 COVID-19 patients. Our results demonstrate the value and power of  
81 MALDI-TOF to classify and predict the progression of COVID-19 in a clinical  
82 setting.

83

## 84 **MATERIALS AND METHODS**

### 85 **Ethics Statement**

86 The study was conducted in accordance with the Declaration of Helsinki. All  
87 human samples were taken after written consent of the participants. They were  
88 informed of the purposes of the study, which was approved by the Ethics  
89 Review Board of the Illes Balears (CEI).

90

### 91 **Participants**

92 This study included a total of 80 COVID-19 patients who attended Hospital Son  
93 Espases, the reference hospital of the Balearic Islands, between March 2020  
94 and June 2020. COVID-19 cases were confirmed based on the Chinese  
95 management guideline for COVID-19 (6). Only patients with a positive RT-PCR  
96 test were enrolled.

97 The severity grade of COVID-19 was defined based on the abovementioned  
98 guideline (6). Accordingly, COVID-19 patients were classified into three  
99 subgroups: mild, severe, or critical. Mild included non-pneumonia and mild  
100 pneumonia cases. Severe was characterized by dyspnea, respiratory frequency  
101  $\geq 30$ /minute, blood oxygen saturation  $\leq 93\%$ ,  $\text{PaO}_2/\text{FiO}_2$  ratio  $< 300$ , and/or lung  
102 infiltrates  $> 50\%$  within 24–48 hours. Critical cases were those that exhibited  
103 respiratory failure, septic shock, and/or multiple organ dysfunction/failure.

104 Twenty healthy volunteers, including 13 recovered from COVID-19 were also  
105 included in the study.

### 106 **Sample collection**

107 Blood samples were collected into anticoagulant free-tubes. The tubes were  
108 centrifuged at 2,500 rpm at 20°C for 10 min within a 30-min time frame. Serum  
109 from each patient sample was then collected, aliquoted and stored at –80°C.  
110 Each serum sample was heat inactivated a 56°C for 90 min prior to analysis.

111

### 112 **MALDI-TOF serum sample preparation**

113 The preparation of the serum and the analysis of the samples by MALDI-TOF  
114 MS were performed as previously described (7). Serum samples were purified  
115 and concentrated using reversed phase C18 tip, Pierce™ C18, following the  
116 manufacture instructions. In brief, 20 µl of serum were mixed with 15 µl of  
117 trifluoroacetic acid (TFA) 2%. Samples were passed through the Pierce™ C18  
118 tip by pipetting up and down repeatedly (20 times), followed by the separation  
119 of the unbound protein solution. After washing the Pierce™ C18 tip with 10 µl of  
120 0.1% TFA, the bound proteins/peptides were eluted with 4 µl of 0.1%  
121 TFA:CH<sub>3</sub>CN (1:1, v/v). The solution was passed through the Pierce™ C18 tip  
122 repetitively (8-10 times). The eluted protein/peptide solution was mixed with 4 µl  
123 of a-cyano-4-hydroxycinnamic acid (CHCA) matrix solution (10 mg of CHCA in  
124 1 ml of 5% TFA:CH<sub>3</sub>CN, 1:1, v/v) and 1.5 µl of this mixture were spotted onto a  
125 MTP 384 target plate ground steel (Bruker Daltonics, Leipzig, Germany) and  
126 overlaid with 2 µl of CHCA matrix and allowed to air-drying. The analysis of  
127 each sample was conducted in triplicate.

128

### 129 **MALDI-TOF analysis**

130 Measurements were performed on an Autoflex III MALDI-TOF mass  
131 spectrometer (Bruker Daltonics, Leipzig, Germany) equipped with a 200 Hz

132 smart beam laser. Spectra were generated by averaging 1000 single laser  
133 shots (100 shots at 10 different spot positions) at a laser frequency of 200 Hz  
134 and detected in linear positive mode. The IS1 voltage was 20.1 kV, the IS2  
135 voltage was maintained at 18.7 kV, the lens voltage was 8.4 kV, and the  
136 extraction delay time was 140 ns. Peaks between 2,000 and 25,400 Da were  
137 selected for analysis. Mass accuracy was calibrated externally using the Bruker  
138 Bacterial Test Standard. Triplicates of each sample were obtained.

139

#### 140 **MALDI-TOF mass data processing**

141 Raw mass spectra obtained by MALDI-TOF MS was analysed using the  
142 MALDIquant R package (8). Square root transformation, peak smoothing,  
143 baseline correction, and intensity normalization were performed on each mass  
144 spectrum. The average spectrum from the triplicates was obtained. Peaks were  
145 detected and binned across all average spectra with a signal to noise ratio of 5  
146 and a tolerance of 0.002. Peaks presents in less than 25% of the spectra were  
147 rejected. All spectra from the groups under study were pre-processed, and peak  
148 detection was applied to obtain an intensity matrix. The resulting matrix of peak  
149 intensities was used for Principal Component Analysis (PCA) (9) and Machine  
150 learning (ML) approaches (10). To set up ML, the radial basis function was used  
151 as the kernel function and ANOVA was used to select the 45 most relevant  
152 peaks.

153

#### 154 **Liquid chromatography-mass sample preparation**

155 Three microliters of serum were diluted to 1 ml with 50 mM Ammonium  
156 bicarbonate (0.2  $\mu\text{g}/\mu\text{l}$  taking the average of plasma proteins as 80 mg/ml). One

157 hundred  $\mu\text{L}$  of the dilution were reduced with 11  $\mu\text{l}$  of 50 mM dithiothreitol for 30  
158 minutes at 56°C and were alkylated with 12.5  $\mu\text{l}$  of indole-3-acetic acid 20 mM  
159 for 20 minutes in the dark at 37 °C. Total volume 123.5  $\mu\text{l}$ , containing likely 24  
160  $\mu\text{g}$  of plasma protein, were digested with 10  $\mu\text{L}$  of trypsin 100 ng/ $\mu\text{l}$  at 37°C  
161 overnight. Ten microliters of formic acid (FA) 5% were added to stop the  
162 digestion.

163

#### 164 **Liquid chromatography-mass setup**

165 The digested peptides were analysed by liquid chromatography mass  
166 spectrometry (LC-MS/MS) with a nanoflow Agilent series 1200 LC system  
167 (Agilent Technologies, Waldbronn, Germany), with an autosampler equipped  
168 with an 8  $\mu\text{l}$  capillary loop, coupled to a Q-Exactive Plus Hybrid Quadrupole-  
169 Orbitrap mass spectrometer (ThermoFisher®Scientific) in data dependent  
170 acquisition mode. For each acquisition, peptides were loaded onto a precolumn  
171 (ZORBAX 300 SB-C18, 5  $\mu\text{m}$ , 5 mm \*0.3 mm i.d.) at a flow rate of 15  $\mu\text{l}/\text{min}$  for  
172 2 min and then analysed using a 235 min LC gradient (from 3% to 97% buffer  
173 B) at a flow rate of 250 nl/min (analytical column, ZORBAX 300 SB-C18, 3.5  
174  $\mu\text{m}$ , 150 mm \*0.075 mm i.d.). Buffer A was H<sub>2</sub>O containing FA 0.1%, and buffer  
175 B was acetonitrile with 0.1% FA. All reagents were MS grade. The *m/z* range of  
176 MS1 was 350-1,650 with the resolution at 140,000 (at 200 *m/z*), automatic gain  
177 control (AGC) target of  $3e^6$ , and maximum ion injection time (max IT) of 250 ms.  
178 Top 10 precursors were selected for MS/MS experiment, with a resolution at  
179 17,500 (at 200 *m/z*), AGC target of  $5e4$ , and max IT of 200 ms. The isolation  
180 window of selected precursor was 4 *m/z*.

181



## 182 **Liquid chromatography-mass data processing**

183 The resultant mass spectrometric data were analysed using Proteome  
184 Discoverer (Version 2.2.0.388, Thermo Fisher Scientific) using a protein  
185 database composed of the Homo sapiens fasta database downloaded from  
186 UniProtKB on 12 Jul 2020, containing 20,304 reviewed protein sequences, and  
187 the SARS-CoV-2 virus fasta downloaded from UniProtKB on 20 May 2020,  
188 containing 13 protein sequences. Enzyme was set to trypsin with four missed  
189 cleavage tolerance. Static modifications were set to carbamidomethylation  
190 (+57.02146) of cysteine and variable modifications were set to oxidation  
191 (+15.99492) of methionine and dimethylation (+28.03075) of peptides N-termini.  
192 Precursor ion mass tolerance was set to 10 ppm, and product ion mass  
193 tolerance was set to 0.6 Da. The peptide-spectrum-match allowed 1% target  
194 false discovery rate (FDR) (strict) and 5% target FDR (relaxed). Normalization  
195 was performed against the total peptide amount. The other parameters followed  
196 the default setup.

197

## 198 RESULTS

199 We acquired MALDI mass spectra of 82 serum samples obtained from 80  
200 different COVID-19 patients (from two patients, we analysed two samples  
201 (109/144 and 143/141) collected at different severity grades); 34 samples were  
202 collected from mild COVID-19 patients, 26 from severe patients and 22 from  
203 critical patients. We also analysed 20 serum samples obtained from healthy  
204 people, including 13 samples collected from individuals recovered from COVID-  
205 19. The relevant characteristics of each group are shown in Table 1.

206 All spectra from the four groups under study were processed and peak  
207 detection was applied to obtain an intensity matrix of 135 peaks in the mass  
208 range of 2,000 to 25,000 daltons using MALDIquant. To select the most  
209 characteristic peaks distinguishing the groups classified according to COVID-19  
210 severity, we applied Post hoc Turkey's HSD analysis, which identified 78 peaks  
211 with a FDR (False Discovery Rate) value  $\leq 0.05$ . Figure 1A illustrates the  
212 quantitative variability of those peaks, significantly different, that exhibited a log  
213 fold change  $\geq 2$  for COVID-19 severity on a heatmap. We found clear  
214 differences between critical and mild patients. Twelve peaks were significantly  
215 different and at least four fold more intense in the set of critical patients than in  
216 the mild ones (Figure 1B). However, only two peaks ( $m/z$  11,530 and 11,686)  
217 were significantly different between severe and critical patients (Figure 1B).

218 These results encouraged us to apply ML approaches to classify and predict  
219 COVID-19 severity. We built two support vector machine learning models using  
220 the 135 peaks ( $m/z$ ) obtained from each sample by MALDI-TOF MS. In the first  
221 model, patients were classified as severe and non-severe. Severe patients  
222 group included those that required oxygen support (severe and critical patients),

223 while non-severe were those without oxygen support (mild patients). Seventy-  
224 five percent of the samples from each group were randomly selected to form  
225 the training set, while the remaining 25% of the samples were used for  
226 validation as an independent test cohort. This process was repeated five  
227 independent times, every time ML was tested through fivefold cross-validation.  
228 This model reached an average area under curve (AUC) of 0.911 for Receiver  
229 Operating Characteristic (ROC) curve (8).

230 Using this model, 90 % of the samples were correctly classified with only a 5%  
231 of false positives and 5% of false negatives. PCA separated individuals  
232 according to the severity of COVID-19 (Figure 2) and helped to identify some  
233 outliers (samples 4, 11, 30, 34 from mild patients) previously detected in the  
234 heatmap and in the bloxplots.

235 Next, we assessed whether ML would be able to predict clinical evolution of  
236 severe patients (grade 2). For this model, a database constructed using the  
237 mass spectra of samples from mild (grade 1) and critical (grade 3) patients,  
238 excluding outliers samples, was challenged with the mass spectra of samples  
239 from severe patients (grade 2). As above, this process was repeated five  
240 independent times, every time ML was tested through fivefold cross-validation.  
241 This model reached an AUC of 0.956 for ROC curve. Green and red brackets  
242 below heatmap panel in figure 1A indicate those clinically severe (grade 2)  
243 patients that were clustered by ML as mild or critical, respectively. All severe  
244 patients that were classified by ML as mild had a good clinical evolution except  
245 patients of samples 108 and 144, which worsened to critical 8 days later,  
246 suggesting that this technology is quite accurate to predict favourable  
247 prognostics. On the other hand, five patients (samples 111, 143, 101, 118 and

248 137) classified as clinically severe (grade 2) when the samples were collected,  
249 which 48-96 h later evolved to critical (grade 3), were clearly clustered in the  
250 group of critical patients using machine learning, while the remaining 8 patients  
251 (70, 73, 66, 67, 62, 59, 53, 58) did not worsen to grade 3.

252 Most of the discriminating peaks identified by MALDI-TOF MS analysis had a  
253 low molecular weight (< 5,000 Da). They probably resulted from the  
254 fragmentation of proteins upregulated in severe and critical patients.  
255 Interestingly, the most substantial intensity difference were exhibited by the  
256 peaks with  $m/z$  of 11,530 and 11,686, which might correspond to unfragmented  
257 proteins of the acute phase induced by the virus. To investigate this hypothesis,  
258 we performed a proteomic analysis of the samples by LC MS/MS. We identified  
259 five proteins that were significantly upregulated according to the severity of the  
260 disease; the serum amyloid A2 protein (SAA2), the C reactive protein (CRP),  
261 the serum amyloid protein A1 (SAA1), the lipopolysaccharide binding protein  
262 (LBP) and the gamma chain of the fibrinogen (FGG). Figure 3A illustrates the  
263 quantitative variability of these proteins on a heatmap. Only the serum level of  
264 SAA2 exhibited significant increments between mild and severe patients and  
265 between severe and critical patients (Figure 3B). In addition, SAA1, CRP, LBP  
266 and FGG were increased in the serum from the critical patients compared with  
267 to mild patients, while only CRP and SAA1 were increased in the severe  
268 patients compare to mild patients (Figure 3B). Given that the molecular weight  
269 of SAA1 and SAA2 is approximately 11.7 kDa, depending on the isoform (11),  
270 and that we found a good correlation between the level of both proteins and the  
271 intensity of the peaks with  $m/z$  of 11,530 and 11,686, we suggest that these  
272 peaks might correspond to the serum amyloid proteins A1 and A2.

## 273 **DISCUSSION**

274 In this study we demonstrate that the molecular changes that occur in the sera  
275 of COVID-19 patients may be detected by MALDI-TOF MS analysis generating  
276 peptidome profiles that may be used as clinical classifiers. In addition, we show  
277 that it is possible to predict the progression of the disease using the peptidome  
278 signatures obtained with this technology. Finally, we provide strong evidences  
279 that serum amyloid A2 protein is one of the major biomarkers of severe COVID-  
280 19 disease.

281 To our knowledge, only two previous studies reported the use of mass  
282 spectrometry analysis of serum from COVID-19 patients to classify disease  
283 severity (4, 5). However, both studies were performed using sophisticated  
284 technologies, which are not available in most of the hospitals. Our challenge  
285 was to test whether MALDI-TOF MS analysis, a simpler technology available in  
286 most of the clinical microbiology laboratories for identification of microbial  
287 species, was able to achieve similar results. Our study classified severe  
288 patients with a high accuracy (90%), very similar to that obtained in a previous  
289 report (93%) (4), with a very low number of false results.

290 We represented the changes of those peaks that exhibited major changes upon  
291 grouping the patients according to CDC Chinese severity criteria, ranging from  
292 scale 1 to scale 3 in a heatmap, which graphically illustrated how level changes  
293 in these peaks reflected a progression from mild to critical COVID-19.  
294 Interestingly, our peptidome profile data identify the most important changes  
295 within the severe patients, upon which a patient is put on oxygen supply. This  
296 observation is consistent with the proteome analysis conducted by Messner et  
297 al, who found that at molecular level the requirement of oxygen supply

298 coincided with the progression to severe disease (5). In contrast, mild patients  
299 have a peptidome signature virtually identical to the healthy controls suggesting  
300 that in non-severe patients changes are restricted to the site of infection, the  
301 respiratory tract, without significant molecular systemic alterations. Bloxplot  
302 representation also identified outlier samples that were confirmed by PCA. As  
303 occurred in the study by Messner et al. (5), it is likely that these samples were  
304 collected from patients with certain underlying pathologies or under specific  
305 treatments that altered the peptidome signature.

306 Case studies demonstrated the clinical utility of the peptidome profiles to  
307 classify and predict COVID-19 evolution. First, five samples from patients  
308 classified as clinically severe, presented a profile very similar to the group of  
309 critical patients in the heatmap and clustered in this group using ML 48-96 h  
310 before they clinically progressed to critical. Second, sample 141 obtained from  
311 the same patient as sample 143, which evolved from severe to critical, was  
312 collected two days before it was discharged and presented a peptidome profile  
313 clustered as mild by ML and in the heatmap. On the other hand, samples from  
314 patients completely recovered of COVID-19 (blue bracket in figure 1A) or those  
315 that evolved from severe to mild had peptidome signatures similar to those  
316 observed in the healthy control patients. Conversely, peptidome profile of  
317 sample 144, obtained from the same patient as sample 109, but eight days  
318 before he progressed to critical, was not able to predict the clinical trajectory of  
319 this patient.

320 Overall, these results suggest that peptidome profiles obtained by MALDI-TOF  
321 MS may represent a good prognostic tool to support clinical decisions.  
322 However, it would be interesting to conduct a longitudinal study with sequential

323 daily samples from a cohort of patients at different grades of severity until their  
324 recovery to assess the anticipation time of prediction.

325 One of the potential limitations of our study is that due to the rapid response  
326 required in the initial stages of the pandemic situation, we collected samples  
327 from the patients that were admitted in our hospital using as unique criteria that  
328 they were hospitalized due to a SARS-CoV-2 infection. Therefore our study did  
329 not take in account some confounding factors, like age. Nonetheless, the  
330 change of the intensity of the peaks between groups substantially exceeded the  
331 variability observed within each group with ages ranging from 33 to 89,  
332 suggesting that differences in the peptidomes profiles of different groups are  
333 poorly influenced by confounding factors.

334 Two of the most intense peaks detected in the sera from critical patients had  
335 *m/z* of 11,530 and 11,686 that might correspond to two different isoforms of the  
336 serum amyloid A protein (11). This acute phase markers, induced by the  
337 proinflammatory cytokine IL-6, were two of the predominant proteins detected  
338 by both Shen et al and Messner et al in their respective studies (4,5). As in our  
339 study, they also detected CRP, LBP and FGG as clear protein biomarkers for  
340 COVID-19 severity.

341 In conclusion, our study supports the potential of the MALDI-TOF MS as a fast  
342 and clinically available technology to aid clinicians in their decisions on COVID-  
343 19 patients and identifies serum amyloid protein A2 as an excellent biomarker  
344 to monitor COVID-19 patients.

345

346 **ACKNOWLEDGMENTS**

347 The authors thank Sara Fernández for helpful discussions on statistical

348 analysis. This study was funded by Instituto de Investigación Sanitaria de las

349 Islas Baleares (IdISBa).

350



351 **REFERENCES**

352

353 1. Huang C, Wang Y, Li X, Ren L, Zhao J, Hu Y, Zhang L, Fan G, Xu J, Gu X,  
354 Cheng Z, Yu T, Xia J, Wei Y, Wu W, Xie X, Yin W, Li H, Liu M, Xiao Y, Gao  
355 H, Guo L, Xie J, Wang G, Jiang R, Gao Z, Jin Q, Wang J, Cao B. 2020.  
356 Clinical features of patients infected with 2019 novel coronavirus in Wuhan,  
357 China. *Lancet* 395: 497-506.

358

359 2. Chen N, Zhou M, Dong X, Qu J, Gong F, Han Y, Qiu Y, Wang J, Liu Y, Wei  
360 Y, Xia J, Yu T, Zhang X, Zhang L. 2020. Epidemiological and clinical  
361 characteristics of 99 cases of 2019 novel coronavirus pneumonia in Wuhan,  
362 China: a descriptive study. *Lancet* 395: 507-13.

363

364 3. Wang D, Hu B, Hu C, Zhu F, Liu X, Zhang J, Wang B, Xiang H, Cheng Z,  
365 Xiong Y, Zhao Y, Li Y, Wang X, Peng Z. 2020. Clinical characteristics of  
366 138 hospitalized patients with 2019 novel coronavirus-infected pneumonia  
367 in Wuhan, China. *JAMA* 323: 1061-69.

368

369 4. Shen B, Yi X, Sun Y, Bi X, Du J, Zhang C, Quan S, Zhang F, Sun R, Qian  
370 L, Ge W, Liu W, Liang S, Chen H, Zhang Y, Li J, Xu J, He Z, Chen B, Wang  
371 J, Yan H, Zheng Y, Wang D, Zhu J, Kong Z, Kang Z, Liang X, Ding X, Ruan  
372 G, Xiang N, Cai X, Gao H, Li L, Li S, Xiao Q, Lu T, Zhu Y, Liu H, Chen H,  
373 Guo T. 2020. Proteomic and metabolomic characterization of COVID-19  
374 patient sera. *Cell* 182:59-72.

375

- 376 5. Messner CB, Demichev V, Wendisch D, Michalick L, White M, Freiwald A,  
377 Textoris-Taube K, Vernardis SI, Egger AS, Kreidl M, Ludwig D, Kilian C,  
378 Agostini F, Zelezniak A, Thibeault C, Pfeiffer M, Hippenstiel S, Hocke A,  
379 von Kalle C, Campbell A, Hayward C, Porteous DJ, Marioni RE,  
380 Langenberg C, Lilley KS, Kuebler WM, Mülleder M, Drosten C, Suttorp N,  
381 Witzenrath M, Kurth F, Sander LE, Ralser M. 2020. Ultra-high-throughput  
382 clinical proteomics reveals classifiers of COVID-19 infection. *Cell Syst*  
383 11:11-24.
- 384
- 385 6. The novel coronavirus pneumonia emergency response epidemiology  
386 team. The epidemiological characteristics of an outbreak of 2019 novel  
387 Coronavirus diseases (COVID-19) — China, 2020. *China CDC Weekly*  
388 2020; 2: 113-122.
- 389
- 390 7. Barceló F, Gomila R, de Paul I, Gili X, Segura J, Pérez-Montaña A,  
391 Jimenez-Marco T, Sampol A, Portugal J. 2018. MALDI-TOF analysis of  
392 blood serum proteome can predict the presence of monoclonal  
393 gammopathy of undetermined significance. *PLoS One* 13:e0201793.
- 394
- 395 8. RStudio Team. *RStudio: Integrated Development Environment for R*.  
396 Boston, MA. Retrieved from <http://www.rstudio.com/> 2015.
- 397
- 398 9. Wold S, Esbensen K, Geladi, P. Principal component analysis.  
399 *Chemom.Intell. Lab. Syst* 1987; 2:37–52.
- 400

- 401 10. Tyanova S, Temu T, Sinitcyn P, Carlson A, Hein MY, Geiger T, Mann M,  
402 Cox J. 2016. The Perseus computational platform for comprehensive  
403 analysis of (prote)omics data. *Nat Methods* 13:731-40.  
404
- 405 11. Li J, Xie Z, Shi L, Zhao Z, Hou J, Chen X, Cui Z, Xue P, Cai T, Wu P, Guo  
406 S, Yang F. 2012. Purification, identification and profiling of serum amyloid A  
407 proteins from sera of advanced-stage cancer patients. *J Chromatogr B  
408 Analyt Technol Biomed Life Sci* 15;889-890.  
409  
410

411 **Table 1. Relevant characteristics of the individuals included in this study**  
412

|            | <b>Healthy</b><br>(n=20) | <b>COVID-19 patients</b> |                  |                    |
|------------|--------------------------|--------------------------|------------------|--------------------|
|            |                          | Mild<br>(n=33)           | Severe<br>(n=26) | Critical<br>(n=21) |
| <b>Sex</b> |                          |                          |                  |                    |
| Male       | 11                       | 11                       | 16               | 21                 |
| Female     | 9                        | 22                       | 10               | 0                  |
| <b>Age</b> |                          |                          |                  |                    |
| Mean ± SD  | 50±12.3                  | 55.2±16.7                | 63.2±9.9         | 63.2±10.1          |
| Median     | 50.5                     | 49                       | 65               | 65.5               |
| Range      | 27-73                    | 34-89                    | 47-81            | 33-76              |

413

414 **FIGURE LEGENDS**

415 **Figure 1. MALDI mass spectra of serum indicate clinical severity in**

416 **COVID-19.**

417 (A) Heatmap illustrates peptidome profiles that inform on COVID-19 severity.

418 Heatmap was generated using the ComplexHeatmap package (8). Groups were

419 classified according to COVID-19 severity following the Chinese management

420 guideline for COVID-19. Blue bracket below heatmap indicates healthy

421 individuals recovered of COVID-19, while green and red brackets indicate

422 samples from patients classified by ML as mild or critical, respectively.

423 (B) Peaks with increased intensity depending on COVID-19 severity. The boxes

424 show the first and third quartiles as well as the median (middle), the mean

425 (cross), and the outliers (circles outside the whiskers).

426

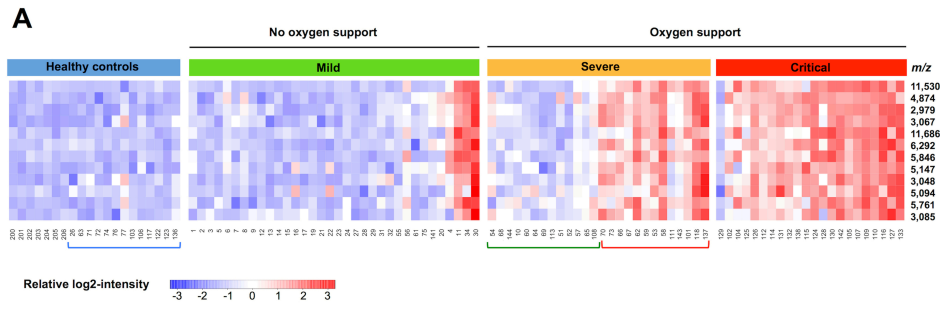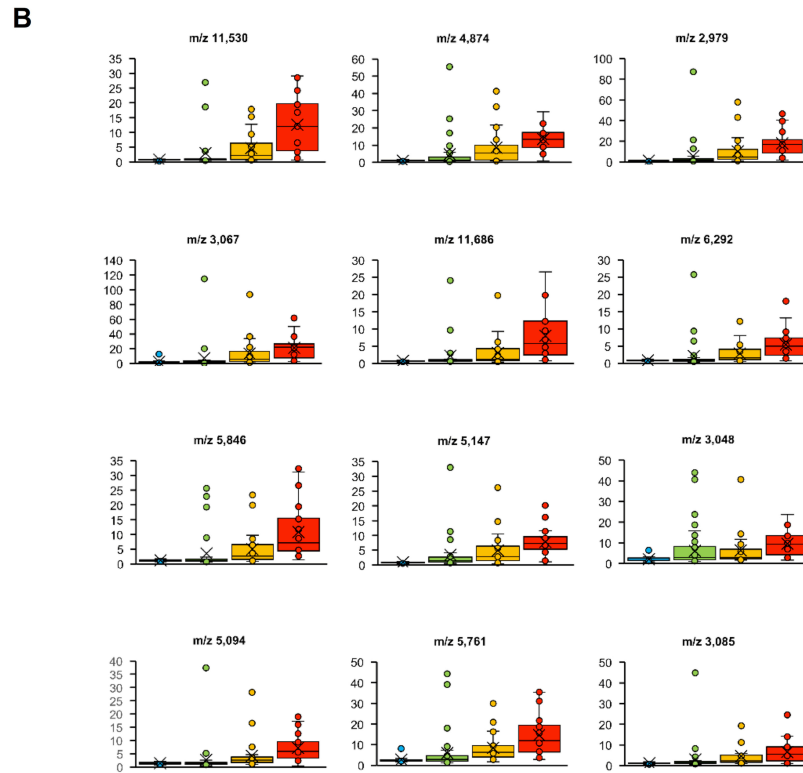

427  
428

429 **Figure 2.** PCA of the mass spectra of the samples from the non-severe (mild)  
430 (green dots) and severe (severe and critical) (red dots) patients. Arrows indicate  
431 outlier samples.

432

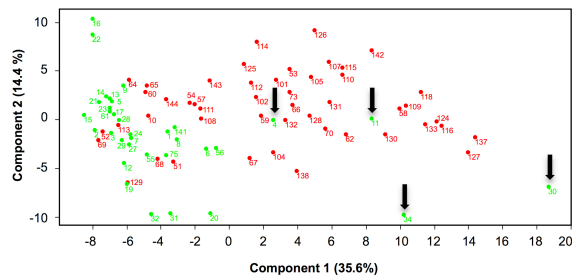

433

434

435 **Figure 3. Upregulated proteins according to COVID-19 severity.**

436 (A) Heatmap illustrates proteins that inform on COVID-19 severity. Heatmap  
437 was generated using the ComplexHeatmap package (8). Only proteins that  
438 were present in more than 70% of the samples identified by at least 5 peptides  
439 and significantly increased ( $P < 0.05$ ) by a log-2 fold change  $> 2$  were included in  
440 the figure. Groups were classified according to COVID-19 severity following the  
441 Chinese management guideline for COVID-19. SAA2 (serum amyloid A2  
442 protein), CRP (C reactive protein), SAA1 (serum amyloid protein A1), LBP  
443 (lipopolysaccharide binding protein) and FG (gamma chain of the fibrinogen).  
444 (B) Upregulated proteins depending on COVID-19 severity. The boxes show the  
445 first and third quartiles as well as the median (middle), the mean (cross), and  
446 the outliers (circles outside the whiskers).  
447

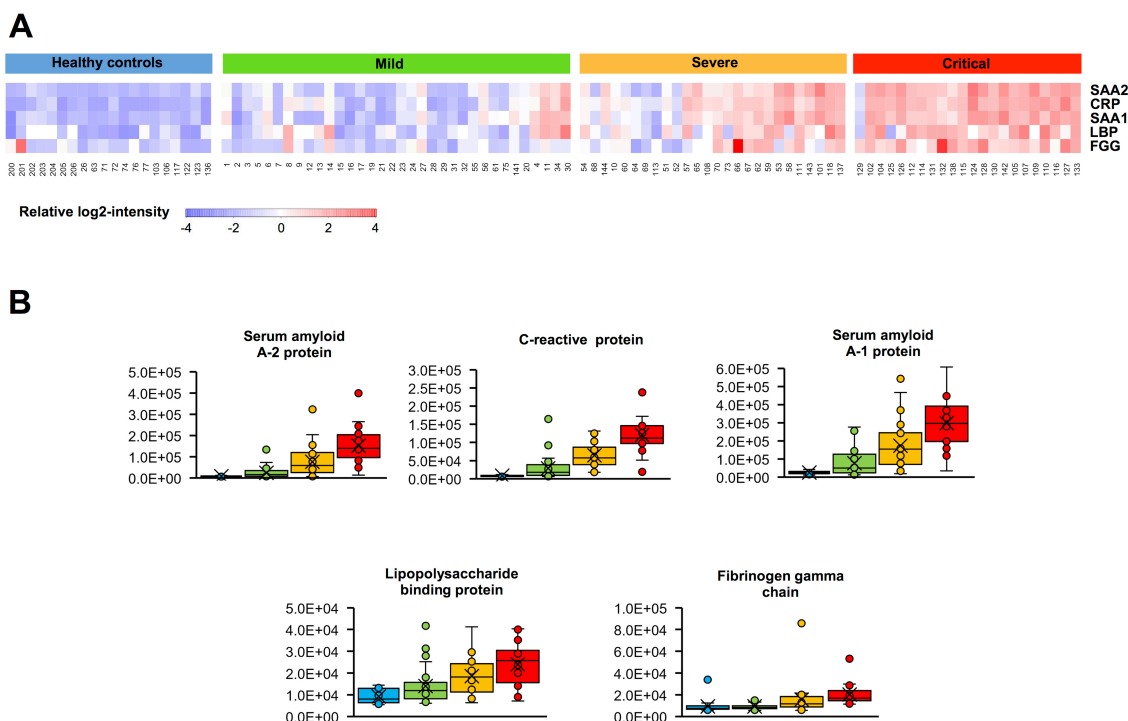

448
